# Supplementary material
Source: PubMed Central journal article supplement (PMC2919966)
Supplement: 0914501107_pnas.200914501SI.pdf [file 0914501107_pnas.200914501SI.pdf]

# Supporting Information

Wong et al. 10.1073/pnas.0914501107

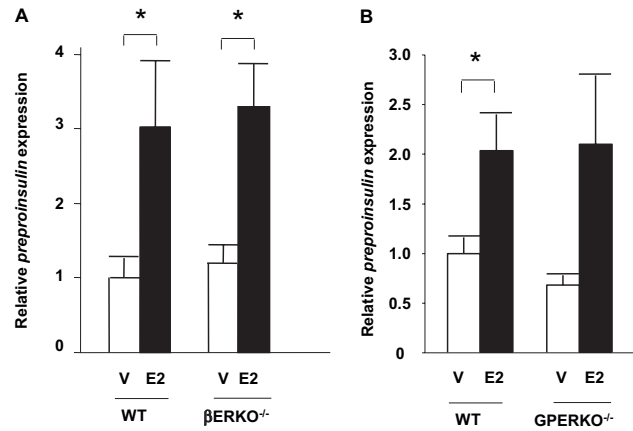

Fig. S1. Relative *preproinsulin* expression in  $\beta$ ERKO<sup>-/-</sup> islets (A) and GPERKO<sup>-/-</sup> islets (B) after E2 ( $10^{-8}$  M) treatment in vitro ( $n = 3-12$  mice/group). Results are expressed as mean  $\pm$  SEM.

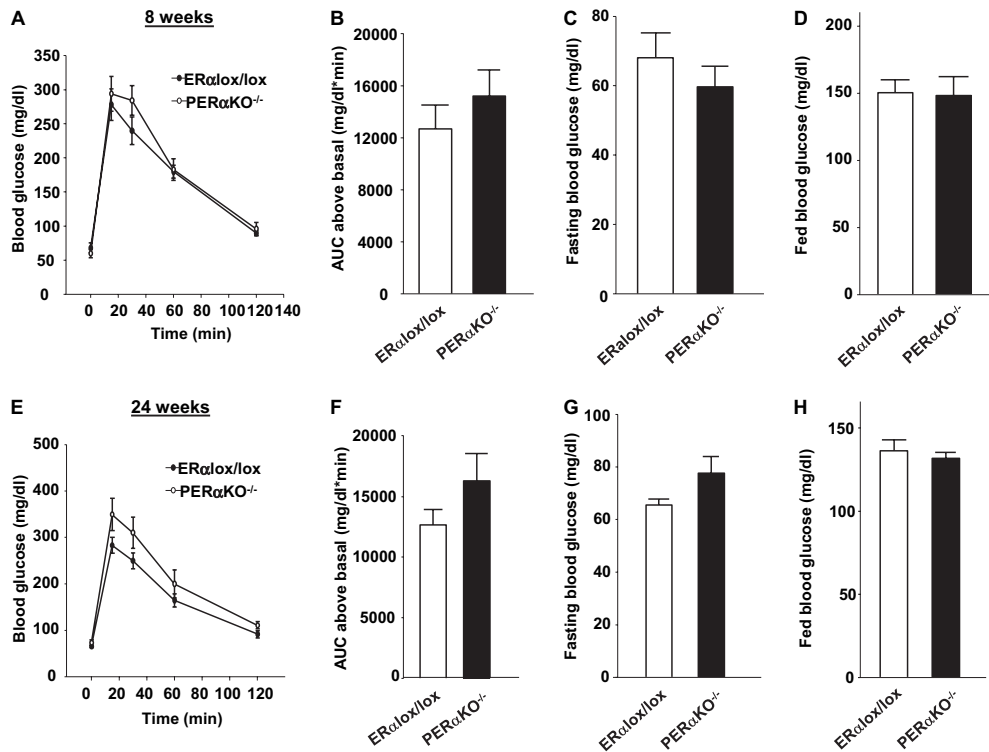

Fig. S2. Metabolic characterization of PER $\alpha$ KO<sup>-/-</sup> mice. (A–D) Glucose tolerance (A) and corresponding area under the curve (B), fasting blood glucose (C), and fed blood glucose (D) at 8 wk in PER $\alpha$ KO<sup>-/-</sup> and ER $\alpha$ lox/lox mice. (E–H) Glucose tolerance (E) and corresponding area under the curve (F), fasting blood glucose (G), and fed blood glucose (H) at 24 wk in PER $\alpha$ KO<sup>-/-</sup> and ER $\alpha$ lox/lox mice ( $n = 6-20$ /group). Results are expressed as mean  $\pm$  SEM.



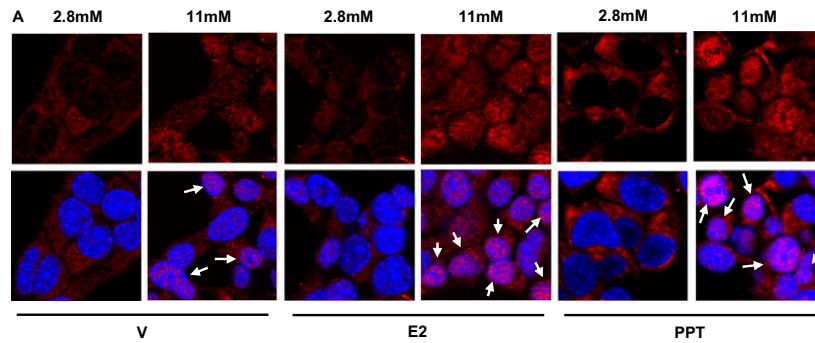

**Fig. S5.** ER $\alpha$ -induced NeuroD1 nuclear localization. NeuroD1 predominant nuclear localization in the presence of E2 ( $10^{-8}$  M) or PPT ( $10^{-8}$  M) at 2.8 mM and 11 mM glucose in MIN6 cells ( $n = 3-6$ /group). Representative images of four independent experiments are shown. Arrows indicate cells with predominant nuclear localization of NeuroD1.

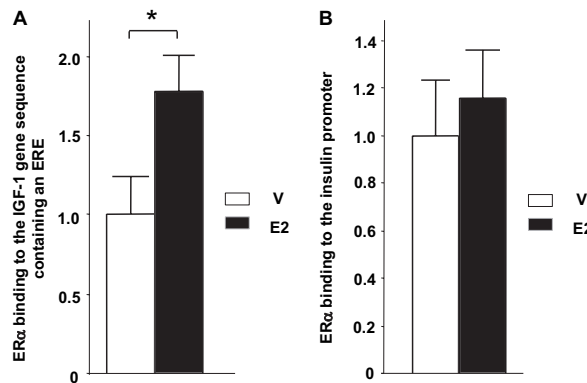

**Fig. S6.** E2-induced *preproinsulin* transcription does not involve direct binding of ER $\alpha$  to the insulin promoter. ChIP showing the recruitment of ER $\alpha$  to the IGF1 gene sequence containing an ERE (A) or insulin promoter (B) after 24-h treatment with E2 ( $10^{-8}$  M) or vehicle (V) at 11 mM glucose in MIN6 cells. After immunoprecipitation of ER $\alpha$  (HC20; Santa Cruz Biotechnology), real-time qPCR amplification of the IGF1 gene sequence containing an ERE and insulin promoter were performed using Sybr Green (BioRad), as described in *Materials and Methods*. Results were normalized to vehicle 11 mM glucose and represent mean  $\pm$  SEM ( $n = 4-5$ /group). \* $P < 0.05$ .

**Table S1. PCR primer sequences**

| Gene                            | Forward primer               | Reverse primer                  | Ref. |
|---------------------------------|------------------------------|---------------------------------|------|
| <i>mER<math>\alpha</math></i>   | 5'-TTGCCCGATAACAATAACAT-3'   | 5'-GGCATTACCACTTCTCTGGGAGTCT-3' | (1)  |
| <i><math>\beta</math>-actin</i> | 5'-AGGTCATCACTATTGGCAAC-3'   | 5'-ACTCATCGTACTCCTGCTTG-3'      | (2)  |
| <i>mInsulin promoter</i>        | 5'-GAAGGTCTCACCTTCTGG-3'     | 5'-GGGGGTTACTGGATGCC-3'         | (3)  |
| <i>mIGF-1</i>                   | 5'GCAGATAGAGCCTGCGCAATGGA-3' | 5'-GGCTGCTGATTTTCCCATCGCT-3'    | (4)  |

- Dupont S, et al. (2000) Effect of single and compound knockouts of estrogen receptors alpha (ERalpha) and beta (ERbeta) on mouse reproductive phenotypes. *Development* 127: 4277-4291.
- Hong YH, et al. (2005) Acetate and propionate short-chain fatty acids stimulate adipogenesis via GPCR43. *Endocrinology* 146:5092-5099.
- Andrali SS, Qian Q, Ozcan S (2007) Glucose mediates the translocation of NeuroD1 by O-linked glycosylation. *J Biol Chem* 282:15589-15596.
- Hewitt SC, Li Y, Li L, Korach KS (2010) Estrogen-mediated regulation of Igf1 transcription and uterine growth involves direct binding of estrogen receptor alpha to estrogen-responsive elements. *J Biol Chem* 285:2676-2685.
